# Supplementary material for: Duplex Proximity Sequencing (Pro-Seq): A method to improve DNA sequencing accuracy without the cost of molecular barcoding redundancy
Source: PLoS One. 2018 Oct 2;13(10):e0204265. doi: 10.1371/journal.pone.0204265 (PMC6168144; doi:10.1371/journal.pone.0204265)
Supplement: S3 Table — The second replicate of 0.1% had low EGFR L858R representation compared to other mutants, but still above one template copy, and may be due to sampling variation. (XLSX) [file pone.0204265.s003.xlsx]

## Sheet: Sheet1
Expected Mutant Frequency		0.001	0.001	0.0003	0.0003	0.0001	0.0001	3e-05	3e-05	0	0
										(wild-type)	(wild-type)
Replicate		1	2	1	2	1	2	1	2	1	2
Measured Mutation Frequency
Gene	Variant
EGFR	T790M	0.00049	0.001164	0.00017	0.00031	8e-05	4e-05	2e-05	2e-05	1e-05	1e-05
EGFR	L858R	0.00114	0.000122	0.0004	0.00037	4e-05	7e-05	2e-05	3e-05	0	0
KRAS	G12D	0.00154	0.000735	7e-05	0.00018	0.00016	5e-05	5e-05	1e-05	0	0
PIK3CA	E545K	0.00139	0.00111	0.00019	0.0006	6e-05	0.00019	4e-05	3e-05	0	0
EGFR	ΔE746 - A750	0.00077	0.001187	0.00037	0.0003	5e-05	0.00011	6e-05	3e-05	0	0
